# Supplementary material for: Human motion component and envelope characterization via wireless wearable sensors
Source: PubMed Central journal article supplement (PMC7422588; doi:10.1186/s42490-020-0038-4), 2020-02-27
Supplement: 42490_2020_38_MOESM1_ESM.pdf [file 42490_2020_38_MOESM1_ESM.pdf]

**Table S1. Wearable Motion Capture Sensor Specifications**

| Sensor                   | Producing Company                | Measurement Capability                                                       | Sampling Rate                                                                              | Battery Life (hrs) | Weight (g) | Dimensions (L x W x D cm) | Memory           | Range                                                                                                        | Resolution                                                                                              |
|--------------------------|----------------------------------|------------------------------------------------------------------------------|--------------------------------------------------------------------------------------------|--------------------|------------|---------------------------|------------------|--------------------------------------------------------------------------------------------------------------|---------------------------------------------------------------------------------------------------------|
| <b>BioStampRC</b>        | MC10                             | Accelerometer<br>Gyroscope<br>ECG<br>EMG                                     | <b>Accelerometer/<br/>Gyroscope</b><br>15.625 - 250 Hz<br><b>ECG/EMG</b><br>125 - 1000 Hz  | 36                 | 7          | 6.6 x 3.4 x 0.45          | 32 MB<br>(Flash) | <b>Accelerometer</b><br>± 16 g<br><b>Gyroscope</b><br>±2000 °/s<br><b>ECG/EMG</b><br>± 200 mV                | <b>Accelerometer</b><br>5 mg<br><b>Gyroscope</b><br>0.2 °/s<br><b>ECG/EMG</b><br>0.006 mV               |
| <b>MotionNode Bus</b>    | MotionNode                       | Accelerometer<br>Gyroscope<br>Magnetometer                                   | <b>Accelerometer/<br/>Gyroscope</b><br>50 Hz                                               | 7                  | 190        | 3.5 x 3.5 x 1.5           | 4 GB             | <b>Accelerometer</b><br>± 2 g or ± 6 g<br><b>Gyroscope</b><br>±2000 °/s<br><b>Magnetometer</b><br>± 100 µT   | <b>Accelerometer</b><br>190 µg ± 5%<br><b>Gyroscope</b><br>0.07 °/s<br><b>Magnetometer</b><br>0.1 µT    |
| <b>Colibri Wireless</b>  | Engineering Systems Technologies | Accelerometer<br>Gyroscope<br>Magnetometer<br>Static Pressure<br>Temperature | <b>Accelerometer/<br/>Gyroscope</b><br>100 Hz                                              | 16                 | 41         | 5.6 x 4.2 x 1.7           | 1 KB             | <b>Accelerometer</b><br>± 6 g<br><b>Gyroscope</b><br>± 2000 °/s<br><b>Magnetometer</b><br>± 1.3 Ga           | <b>Accelerometer</b><br>13 bit<br><b>Gyroscope</b><br>16 bit<br><b>Magnetometer</b><br>12 bit           |
| <b>Opal</b>              | APDM Wearable Technologies       | Accelerometer<br>Gyroscope<br>Magnetometer                                   | <b>Accelerometer/<br/>Gyroscope</b><br>20 - 128 Hz                                         | 12                 | 25         | 4.8 x 4.0 x 1.4           | 1 GB             | <b>Accelerometer</b><br>±16g, ± 200g<br><b>Gyroscope</b><br>± 2000 °/s<br><b>Magnetometer</b><br>± 8 Ga      | <b>Accelerometer</b><br>14 bit, 17.5 bit<br><b>Gyroscope</b><br>16 bit<br><b>Magnetometer</b><br>12 bit |
| <b>Embrace2</b>          | Empatica                         | Accelerometer<br>Gyroscope<br>Temperature                                    | <b>Accelerometer/<br/>Gyroscope</b><br>32 Hz                                               | 48                 | 17         | 3.8 x 3.0 x 1.0           | 1 MB             | <b>Accelerometer</b><br>±16g<br><b>Gyroscope</b><br>± 500 °/s                                                | <b>Accelerometer</b><br>16 bits<br><b>Gyroscope</b><br>16 bits                                          |
| <b>Shimmer3 IMU Unit</b> | Shimmer                          | Accelerometer<br>Gyroscope<br>Magnetometer<br>Altimeter<br>Temperature       | <b>Accelerometer/<br/>Gyroscope</b><br>10 - 1000 Hz<br><b>Magnetometer</b><br>250 -1000 Hz | 70                 | 24         | 5.1 x 3.4 x 1.4           | 16 KB            | <b>Accelerometer</b><br>± 2 - 16 g<br><b>Gyroscope</b><br>± 250 - 2000 °/s<br><b>Magnetometer</b><br>± 49 Ga | <b>Accelerometer</b><br>14 bits<br><b>Gyroscope</b><br>16 bits<br><b>Magnetometer</b><br>16 bits        |

|                         |           |                                                         |                                                            |    |    |                 |      |                                                                                                     |                                                       |
|-------------------------|-----------|---------------------------------------------------------|------------------------------------------------------------|----|----|-----------------|------|-----------------------------------------------------------------------------------------------------|-------------------------------------------------------|
| <b>BioHarness 3.0</b>   | Zephyr    | Accelerometer<br>ECG<br>Temperature                     | <b>Accelerometer</b><br>100 Hz<br><b>ECG</b><br>250Hz      | 24 | 89 | 2.8 x 2.8 x 0.7 | --   | <b>Accelerometer</b><br>±16g<br><b>ECG</b><br>0.25 – 15 mV                                          | <b>Accelerometer</b><br>±12mg<br><b>ECG</b><br>12 bit |
| <b>Physilog 5</b>       | GaitUp    | Accelerometer<br>Gyroscope<br>Barometer<br>Temperature  | <b>Accelerometer/<br/>Gyroscope</b><br>128 Hz              | 21 | 11 | 4.8 x 2.7 x 1.0 | 8 GB | <b>Accelerometer</b><br>± 16 g<br><b>Gyroscope</b><br>±2000 °/s                                     | --                                                    |
| <b>EQ02 LifeMonitor</b> | Equivital | Accelerometer<br>ECG<br>Temperature                     | <b>Accelerometer</b><br>25 – 250 Hz<br><b>ECG</b><br>250Hz | 24 | 38 | 7.8 x 5.3 x 1.0 | 8 GB | <b>Accelerometer</b><br>±2g - 16g                                                                   | --                                                    |
| <b>MTw Awinda</b>       | Xsens     | Accelerometer<br>Gyroscope<br>Magnetometer<br>Barometer | <b>Accelerometer/<br/>Gyroscope</b><br>1000 Hz             | 6  | 27 | 3.0 x 4.7 x 1.3 | --   | <b>Accelerometer</b><br>± 16 g<br><b>Gyroscope</b><br>± 2000 °/s<br><b>Magnetometer</b><br>± 1.9 Ga | --                                                    |

ECG = Electrocardiogram; EMG = electromyogram

**Table S2. Wearable Fitness Tracker Capabilities**

| Sensor                      | Producing Company | Measurement Capability                                   | Weight (g) | Dimensions (L x W x D cm) | Memory        | Data Output                                                                                                                       | Motion Capabilities |
|-----------------------------|-------------------|----------------------------------------------------------|------------|---------------------------|---------------|-----------------------------------------------------------------------------------------------------------------------------------|---------------------|
| <b>BioStampRC</b>           | MC10              | Accelerometer<br>Gyroscope<br>ECG<br>EMG                 | 7          | 6.6 x 3.4 x 0.45          | 32 MB (Flash) | Raw data                                                                                                                          | 6 DOF               |
| <b>Charge 3</b>             | Fitbit            | Accelerometer<br>Gyroscope<br>Altimeter<br>PPG HR        | 30         | 3.8 x 1.8 x 1.2           | 2 GB          | Activity<br>Calories burned<br>Step count<br>Distance<br>Elevation change<br>Heart rate                                           | 6 DOF               |
| <b>Apple Watch Series 5</b> | Apple             | Accelerometer<br>Gyroscope<br>Barometer<br>ECG<br>PPG HR | 37         | 4.4 x 3.8 x 1.1           | 32 GB         | Activity<br>Calories burned<br>Step count<br>Distance<br>Elevation change<br>Filtered ECG<br>Heart rate variability<br>Heart rate | 6 DOF               |
| <b>Vivosmart HR</b>         | Garmin            | Accelerometer<br>Barometer<br>PPG HR                     | 32         | 13.6 x 19.2               | 3 GB          | Activity<br>Calories burned<br>Step count<br>Distance<br>Elevation change<br>Heart rate                                           | 3 DOF               |

ECG = Electrocardiogram; EMG = electromyogram; PPG = photoplethysmography; HR = heart rate; DOF = degrees of freedom

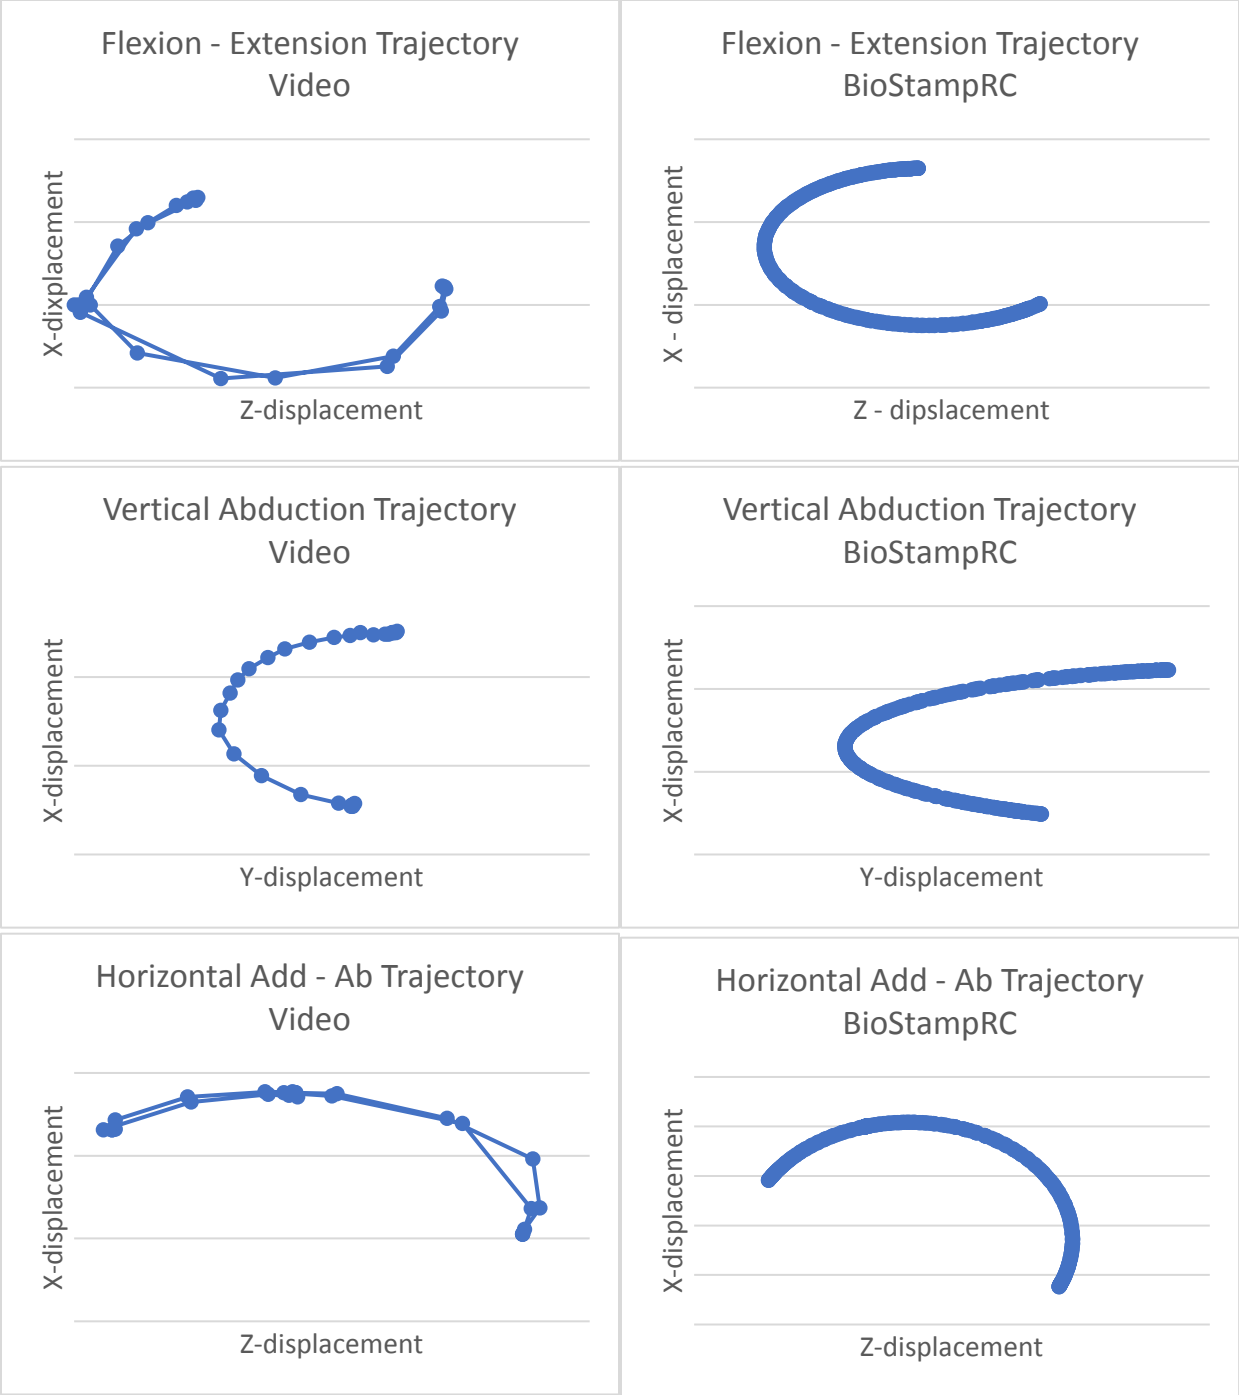

**Fig S1. 2-D Trajectories of Human Arm Motion.** (Left column) 2-dimensional trajectory of arm from video motion tracking compared to (right column) trajectory calculated from BioStampRC gyroscope data.

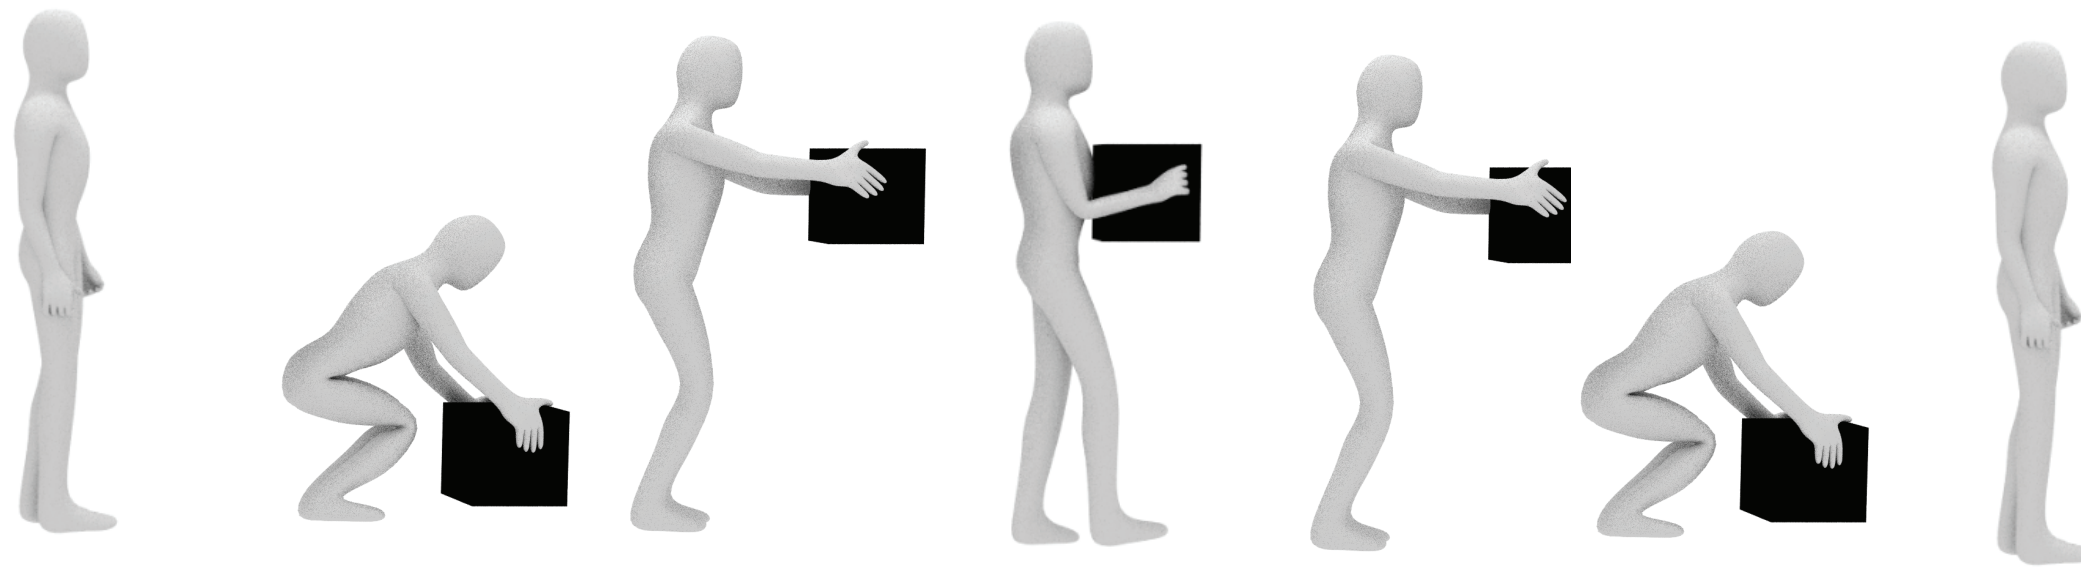

Walk

Pick Up Box

Walk

Put Down Box

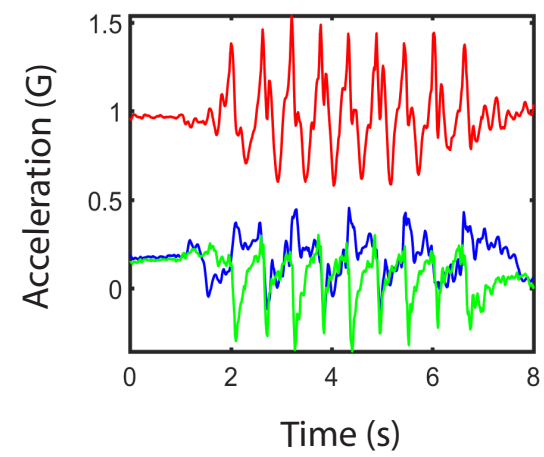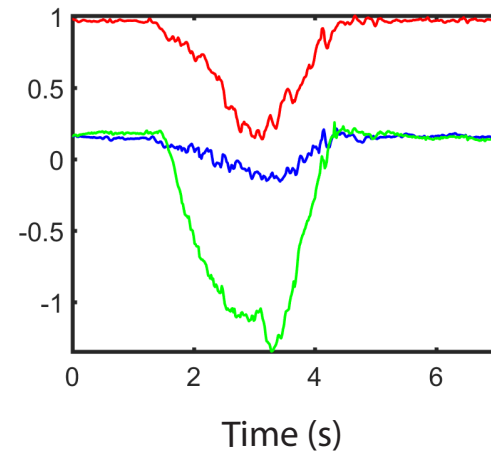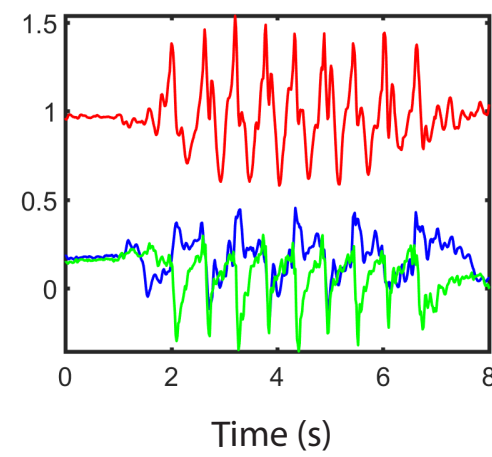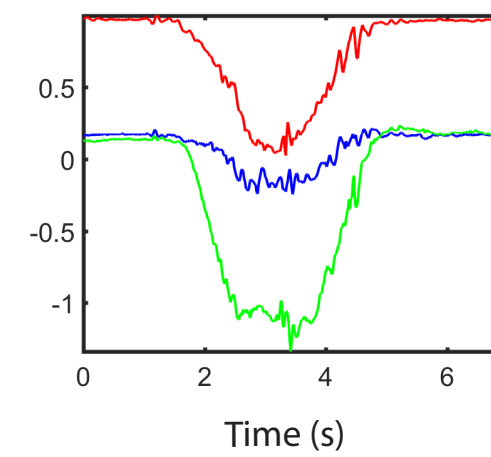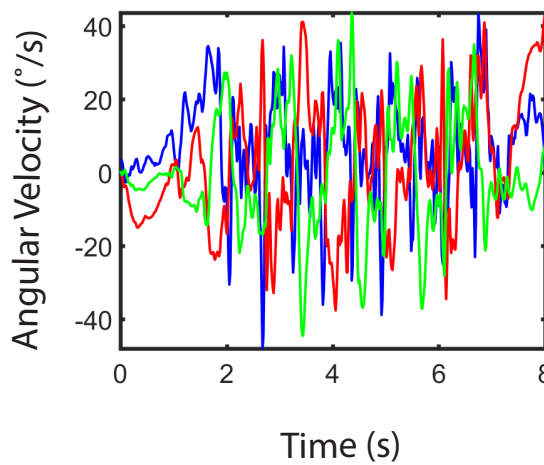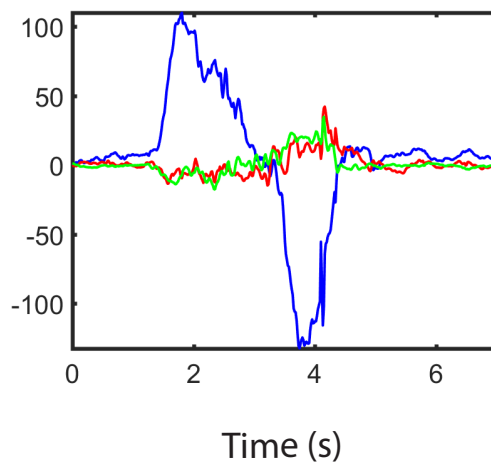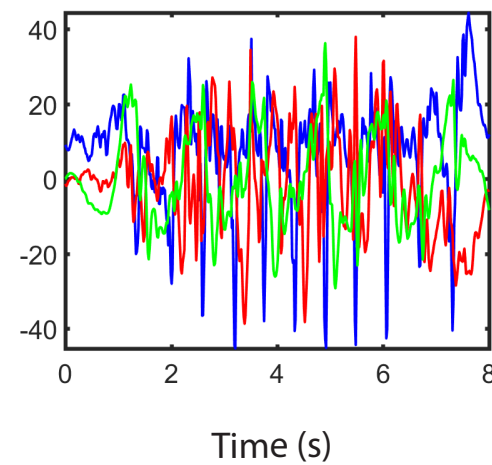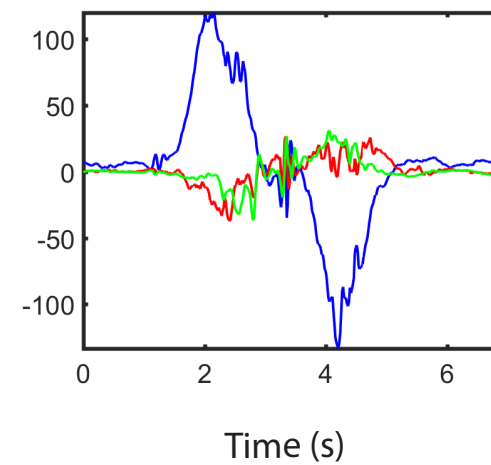

—X—Y—Z

Actions in Series

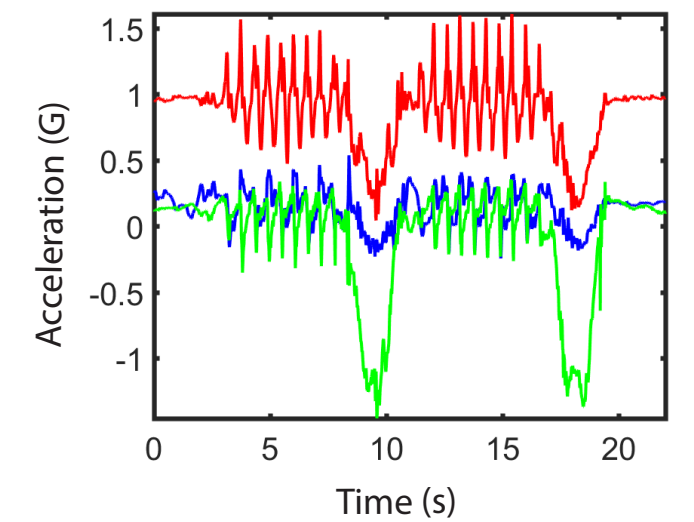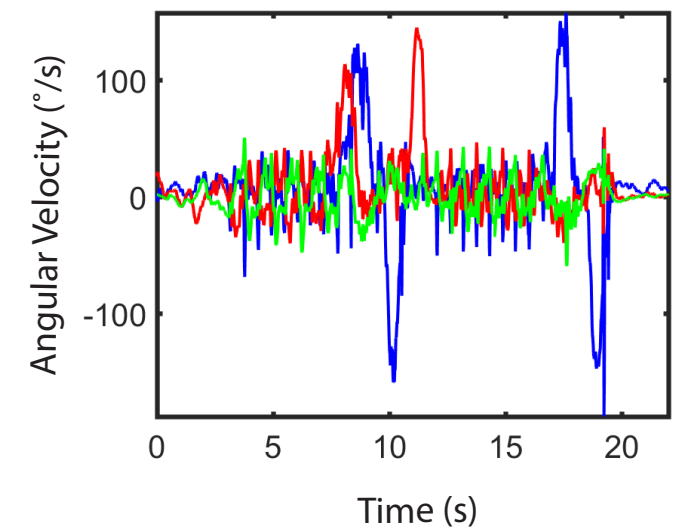

**Fig S2. Motion Signatures of Gross Human Activity Series.** (Top row) Tri-axial acceleration motion signature and (bottom row) tri-axial angular velocity motion signature of human subject performing basic motion activity separately and in series.

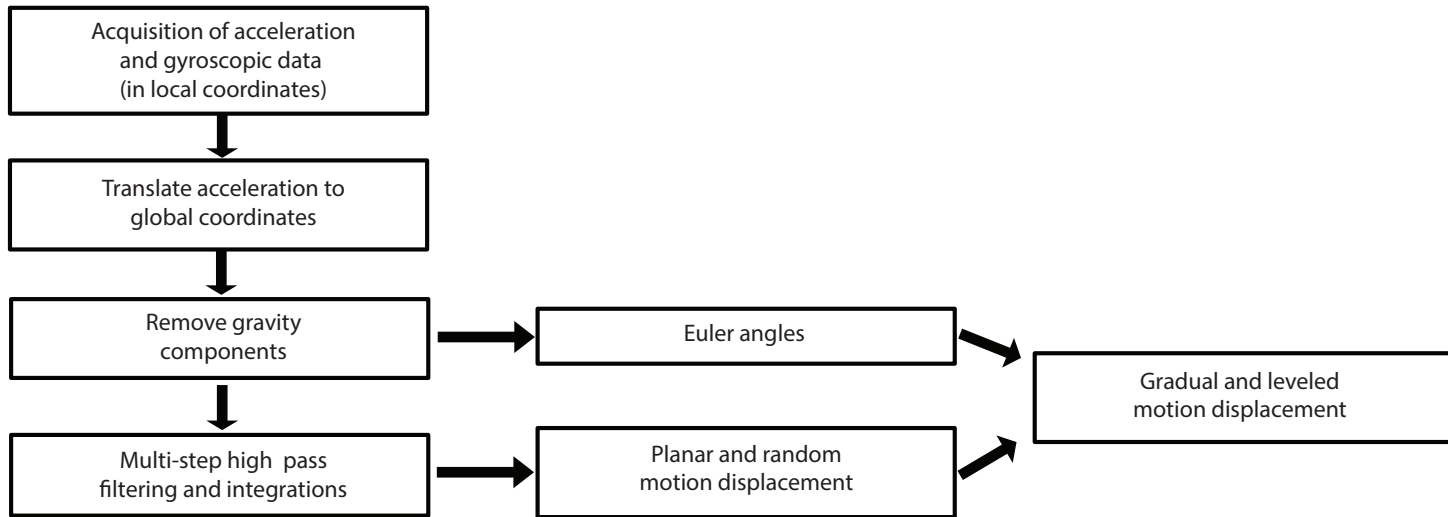

**Fig S3. Flow Diagram of Motion Data Processing.**
